# Supplementary material for: MicroRNA-766-3p Inhibits Tumour Progression by Targeting Wnt3a in Hepatocellular Carcinoma
Source: PubMed Central journal article supplement — Mol Cells. 2018 Aug 27;41(9):830–41. doi: 10.14348/molcells.2018.0181 (PMC6182221; doi:10.14348/molcells.2018.0181), 2018-08-27

**Supplementary figure legends:**

**Fig. S1. The effect of miR-766-3p up-regulation on Wnt3a mRNA expression in SK-HEP-1 cells.** SK-HEP-1 cells were transfected with the miR-766-3p expression plasmid (miR-766-3p) or non-targeting miRNA precursor plasmid (NC). RT-PCR was used to determine HOXA13, Wnt3a, TSG101 and IGFBP2 mRNA expression. The experiments were repeated independently three times. \*\*,  $P < 0.01$ .

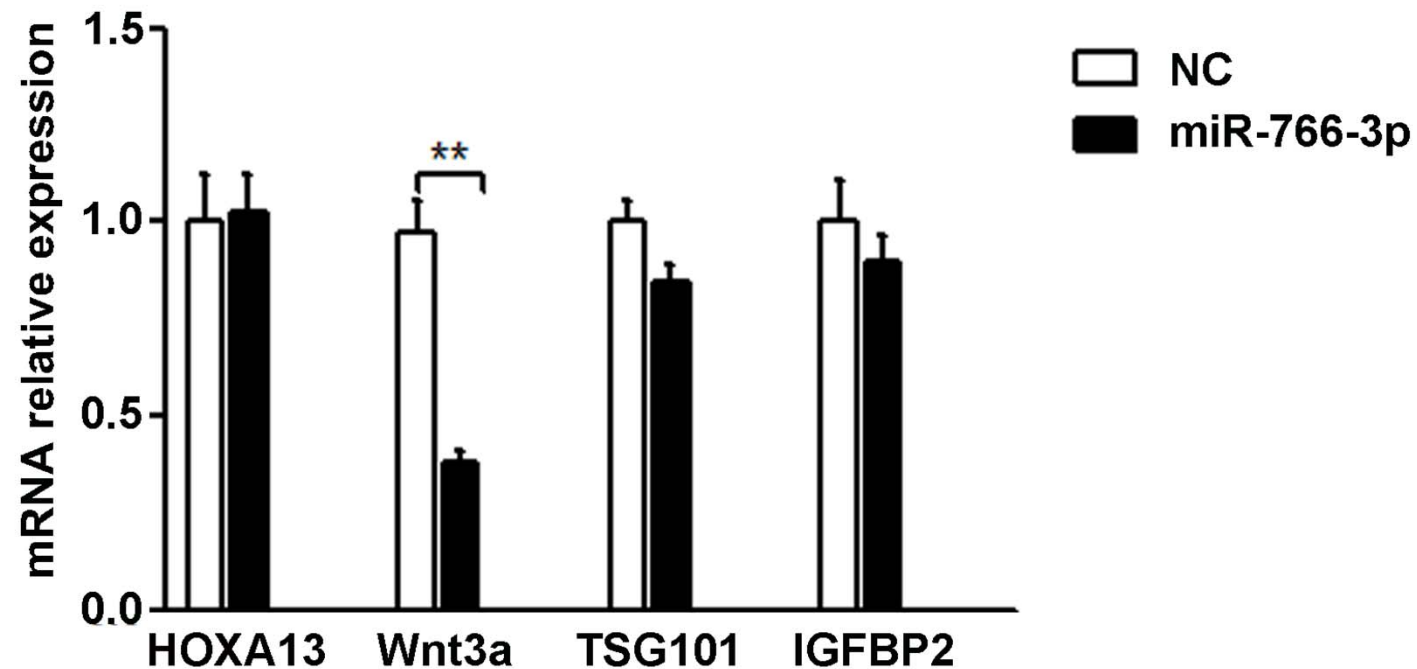

Supplement: molce-41-9-830-suppl.pdf [file molce-41-9-830-suppl.pdf]
